# Supplementary material for: Autism and chronic ill health: an observational study of symptoms and diagnoses of central sensitivity syndromes in autistic adults
Source: Springer Nature journal article supplement (doi:10.1186/s13229-022-00486-6), 2022-02-14

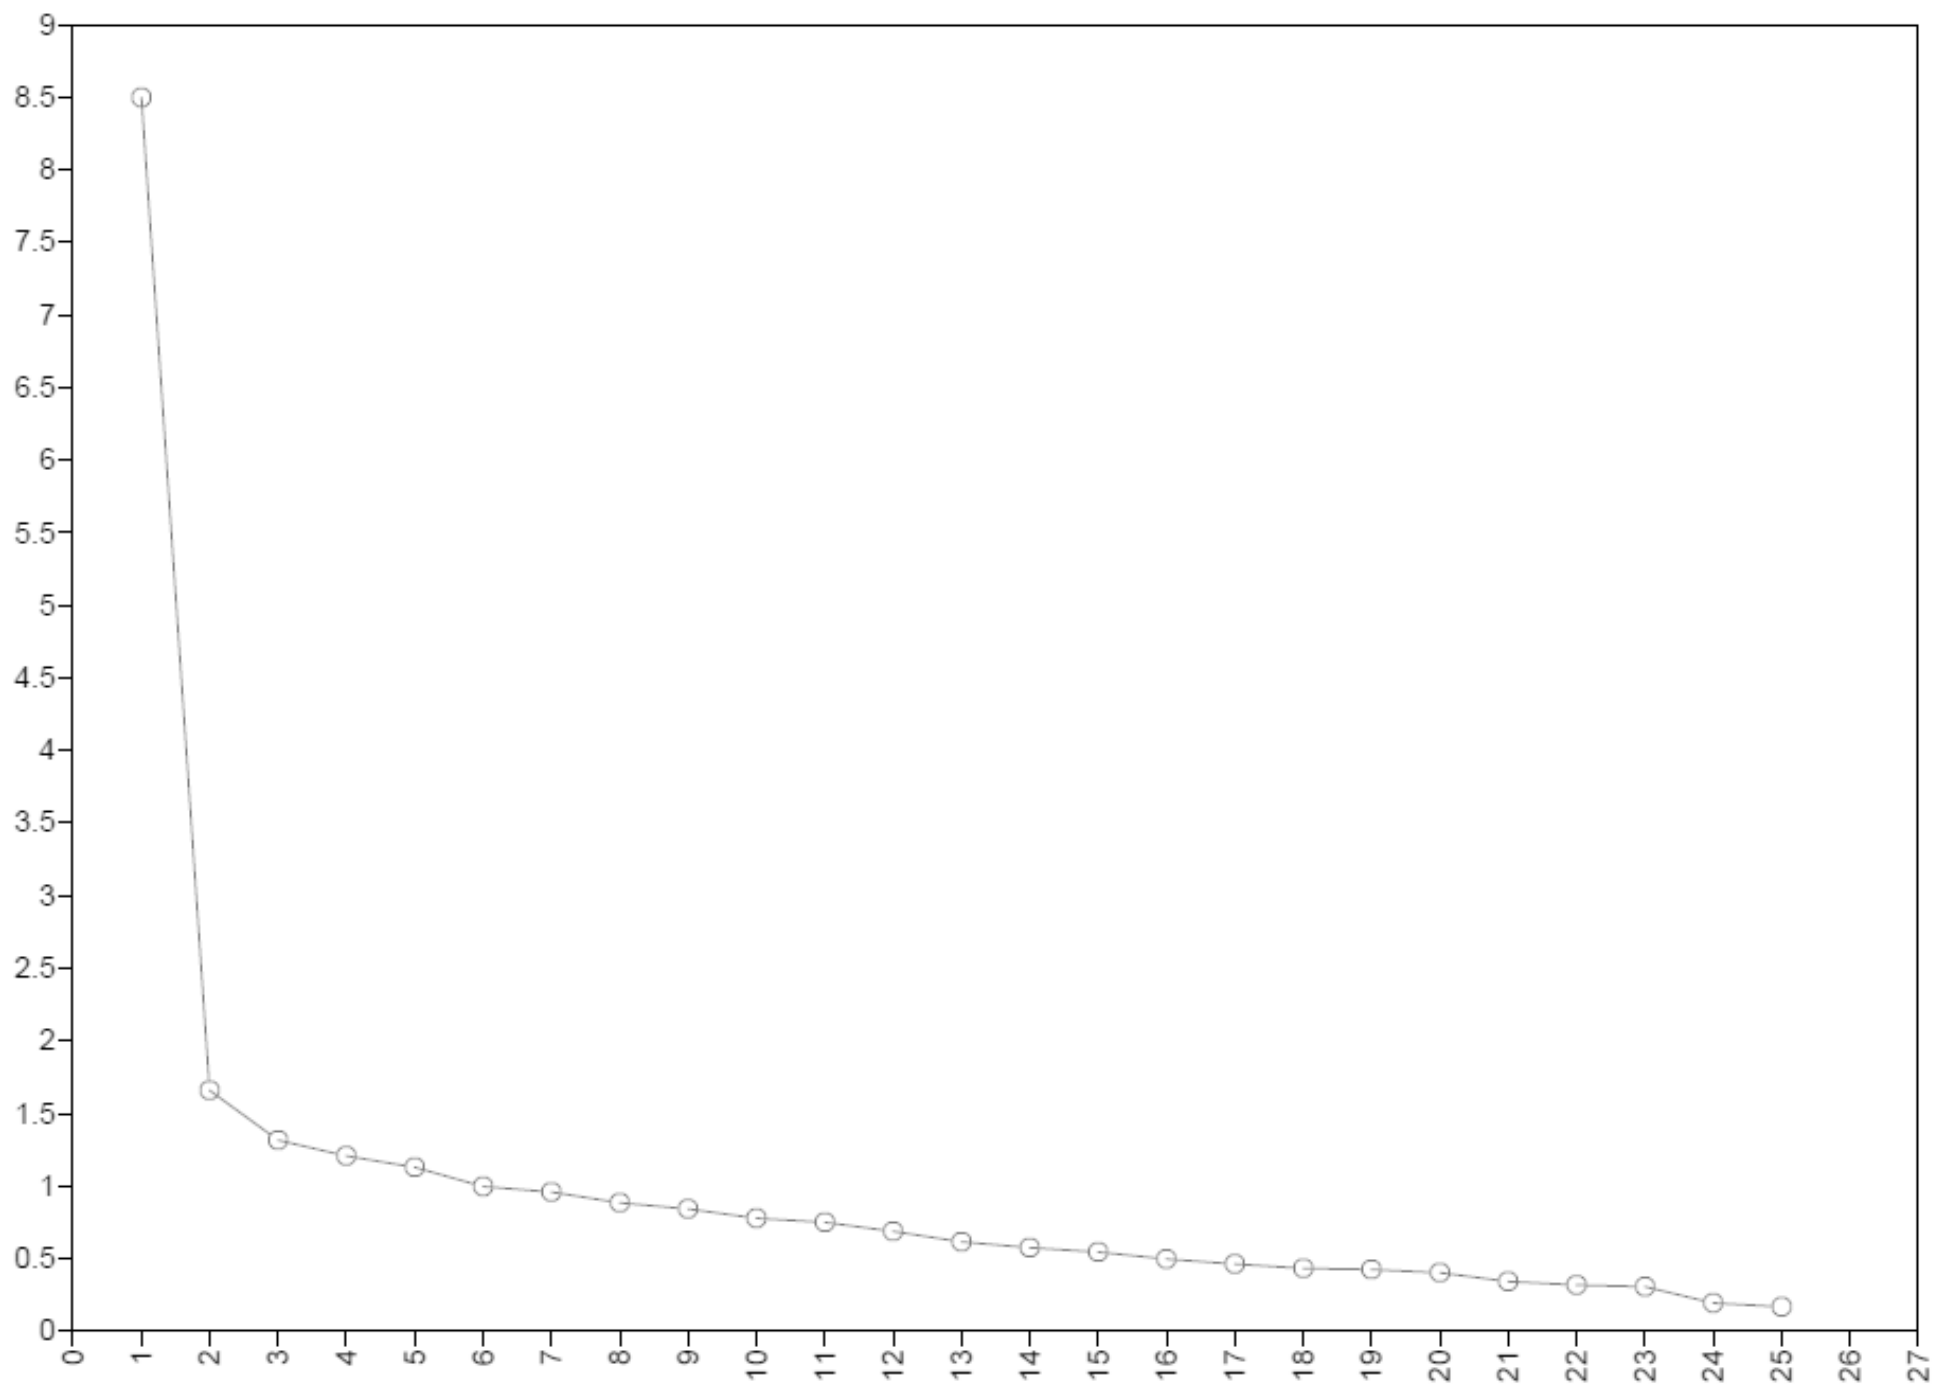

Supplement: MOESM2 [file 20131268]
